# Supplementary material
Source: Research Square preprint supplement (doi:10.21203/rs.3.rs-9612465/v1)
Supplement: Supplementary file 1 [file 2b9c0f63db7ab6774a7050fd.docx]

**SUPPLEMENTAL INFORMATION**

**TREM2 Targeted 89Zr-ImmunoPET Visualizes Microglial Activation during the Inflammatory Response**

Evanta Kabira†, Onder Otlua#†, Taylor M. Brinsona, Ronnie The Phong Trinhb, Wei Xiongc, Yaima L. Lightfoot b, William J. Ray b, Zhiqiang Anc , Ningyan Zhang c, Federica Pisaneschi a*

a Center for Translational Cancer Research, Institute of Molecular Medicine, The University of Texas Health Science Center at Houston

b The Belfer Neurodegeneration Consortium (BNDC). Therapeutics Discovery Division, The University of Texas MD Anderson Cancer Center, Houston, Texas, US.

c Texas Therapeutics Institute, Institute of Molecular Medicine, The University of Texas Health Science Center at Houston

* [Federica.Pisaneschi@uth.tmc.edu](mailto:Federica.Pisaneschi@uth.tmc.edu)

† These two authors contributed equally

# current affiliation: Medical Biochemistry Department, School of Medicine, Malatya Turgut Ozal University, Malatya, Türkiye

**Supplemental Figures**


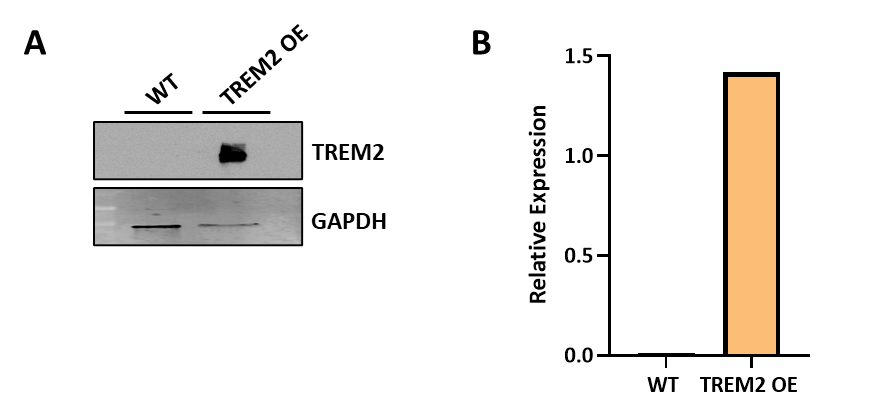


**Supplemental Figure 1: Western Blot with HEK293T WT and TREM2 OE cell lines, using TREM2 and GAPDH antibodies.** A) Western Blot image of TREM2 protein expression in HEK293T WT and TREM2 OE cell lines. B) Quantification of TREM2 levels in the TREM2 and WT parental controls.

The Western Blot displays a high level of TREM2 protein expression in TREM2 OE cell lysates compared to the WT controls (Supplemental Figure 1 A), with the quantification showing a 1.4-fold difference (Supplemental Figure 1 B).

**
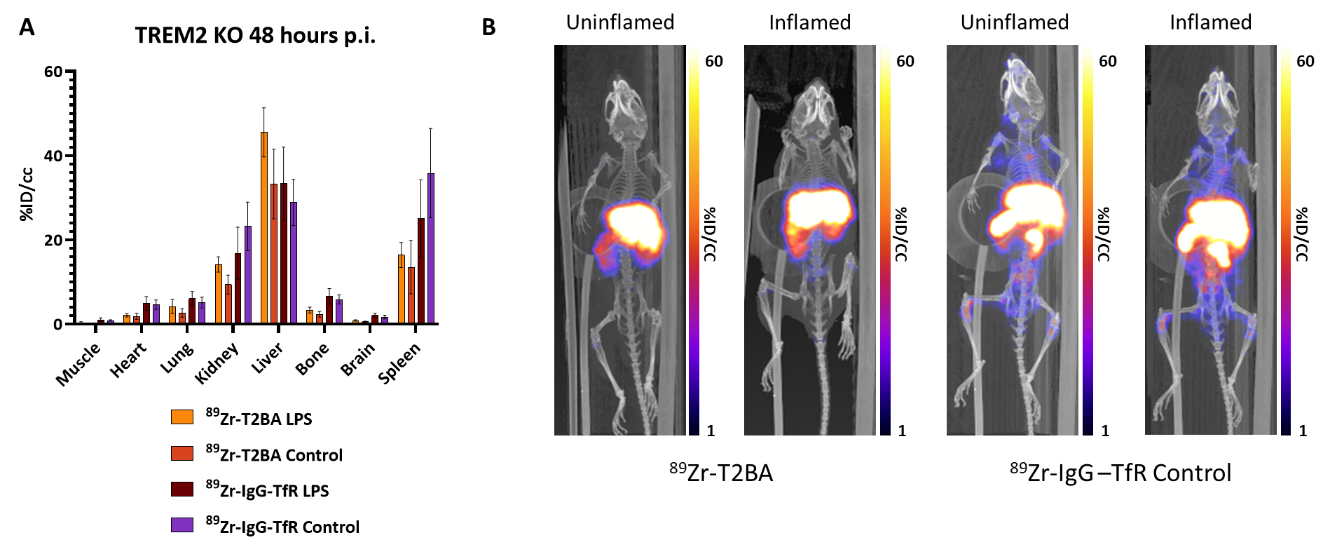
**

**Supplemental Figure 2: 89Zr-T2BA and 89Zr-IgG-TfR biodistribution. A**) Uptake by organ in TREM2 KO LPS-inflamed and uninflamed mice at 48 hours p.i. **B**) Whole body maximum intensity projection (MIP) PET images of WT and TREM2 KO LPS-inflamed mice at 48 hours p.i.

**
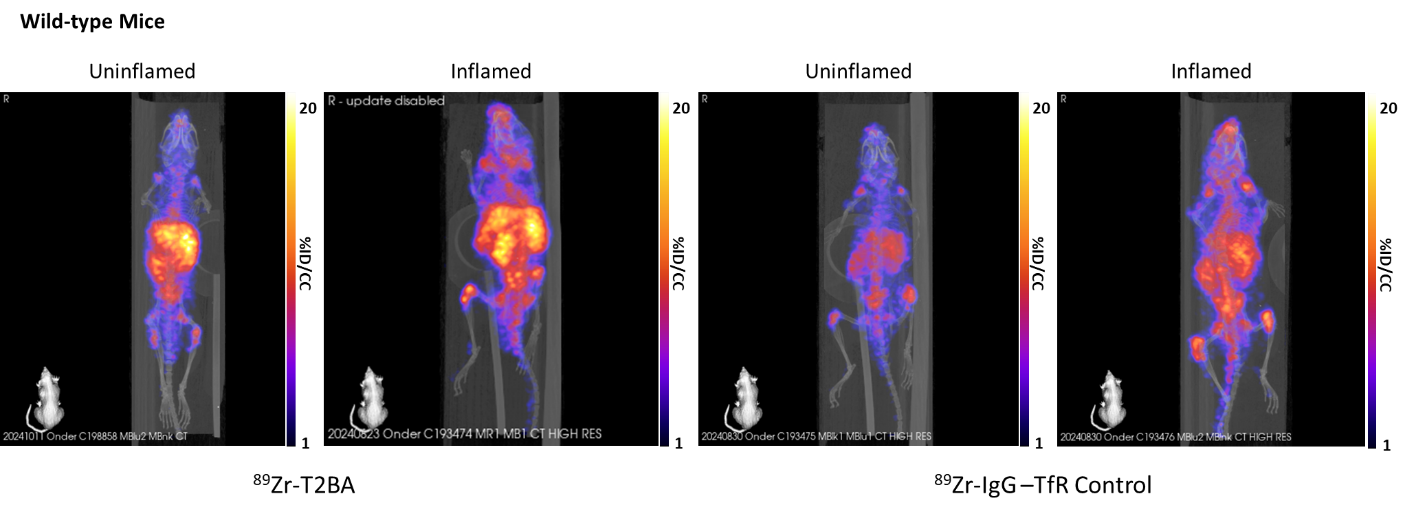
**

**Supplemental Figure 3: Maximum intensity projections (MIPs) for 89Zr-T2BA and 89Zr-IgG-TfR biodistribution in WT mice, including uninflamed and LPS-inflamed mice.**

**
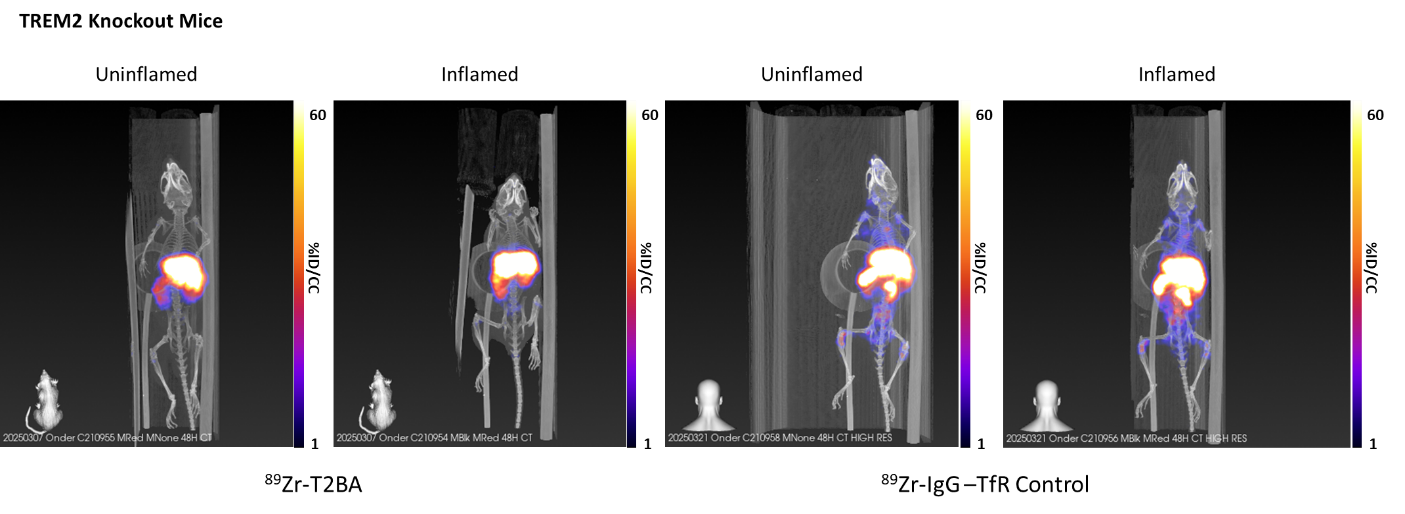
**

**Supplemental Figure 4: Maximum intensity projections (MIPs) for 89Zr-T2BA and 89Zr-IgG-TfR biodistribution in KO mice, including uninflamed and LPS-inflamed mice.**
